# Supplementary material
Source: PubMed Central journal article supplement (PMC2492649)
Supplement: pp.108.119925_1.pdf [file pp.108.119925_1.pdf]

**Supplemental Movie.** Dynamic changes in OsSCAMP1-YFP distribution during cell plate formation in a transgenic BY-2 cell expressing OsSCAMP1-YFP.
